# Supplementary figures and images for: Interplay of vascular endothelial growth factor receptors in organ-specific vessel maintenance
Source: PubMed Central journal article supplement — J Exp Med. 2022 Jan 20;219(3):e20210565. doi: 10.1084/jem.20210565 (PMC8785977; doi:10.1084/jem.20210565), 2022-01-20

VEGFR1

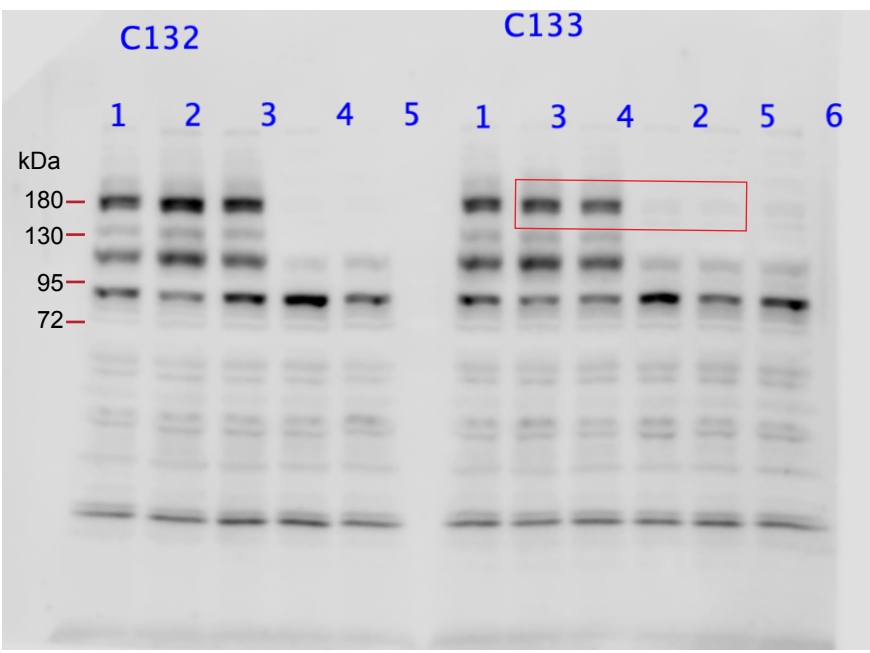

VEGFR2

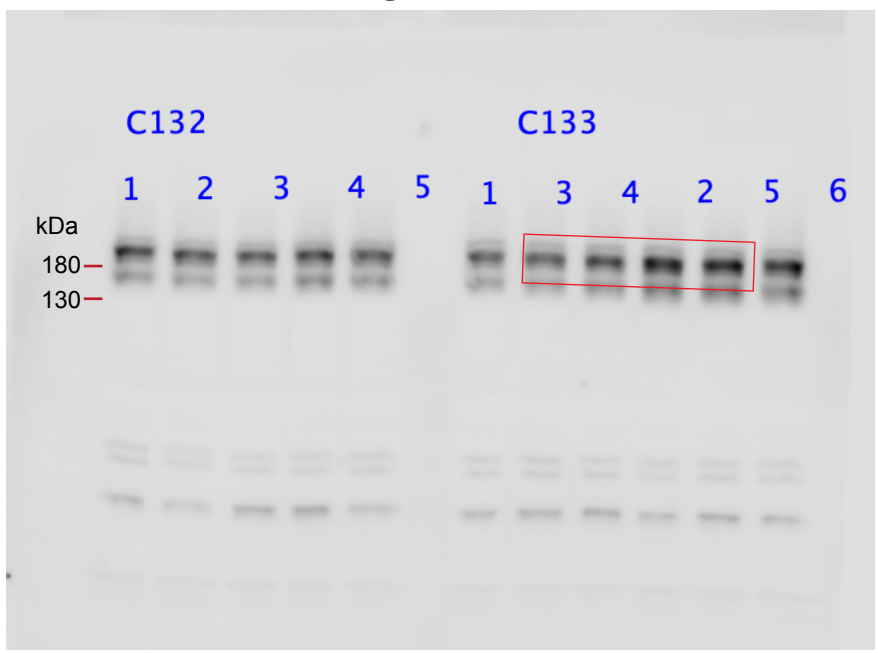

VEGFR3

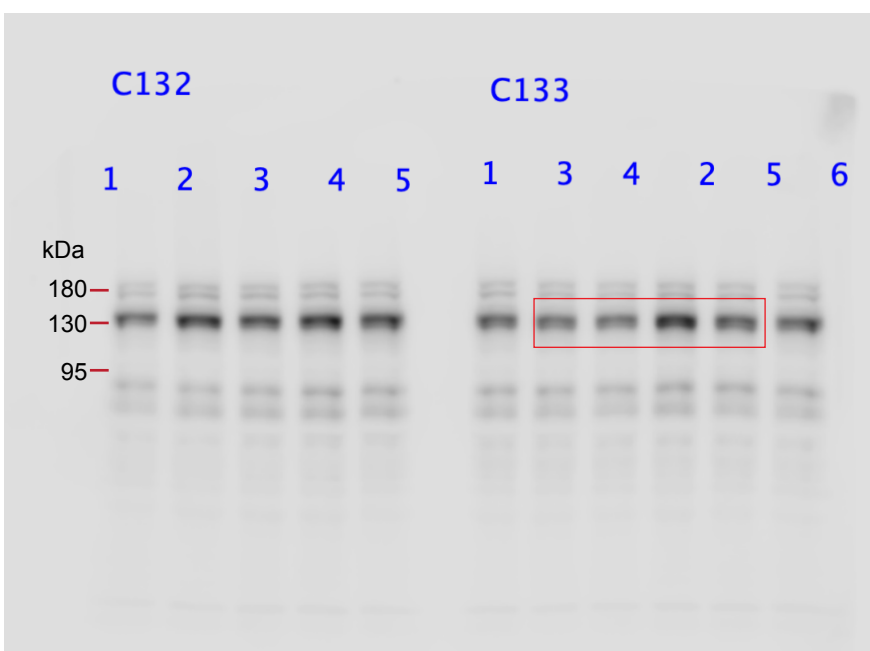

VEC

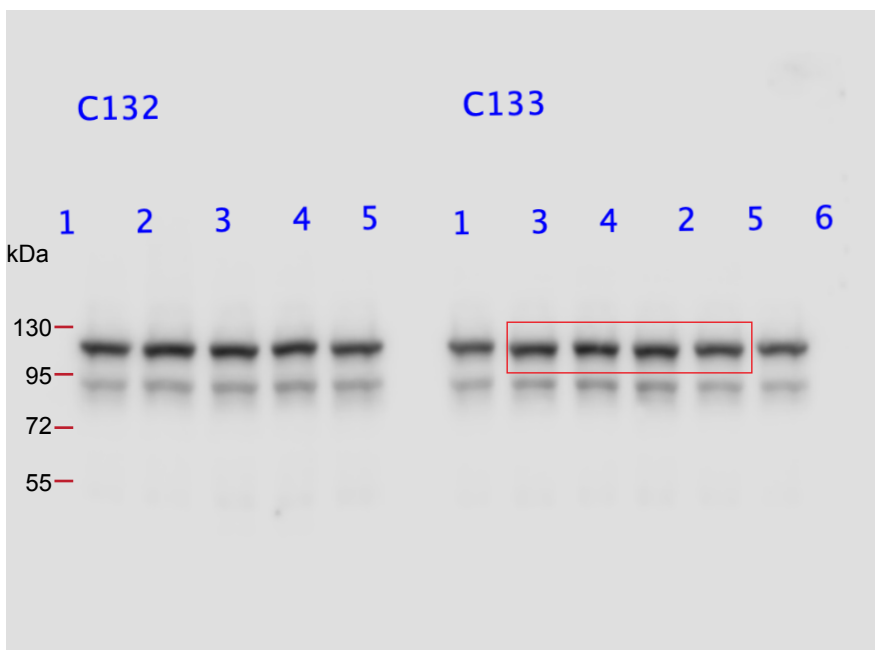

HSC70

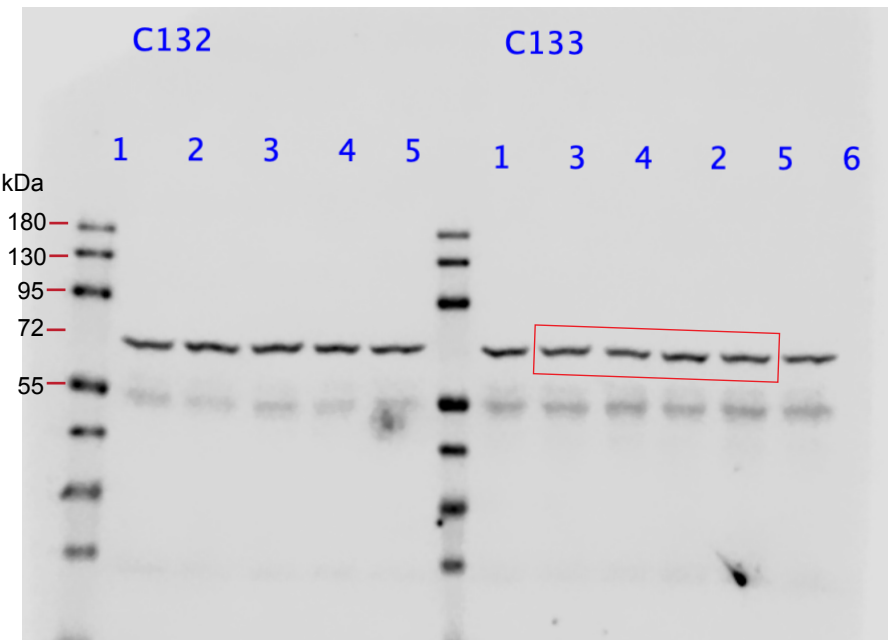

Figure version

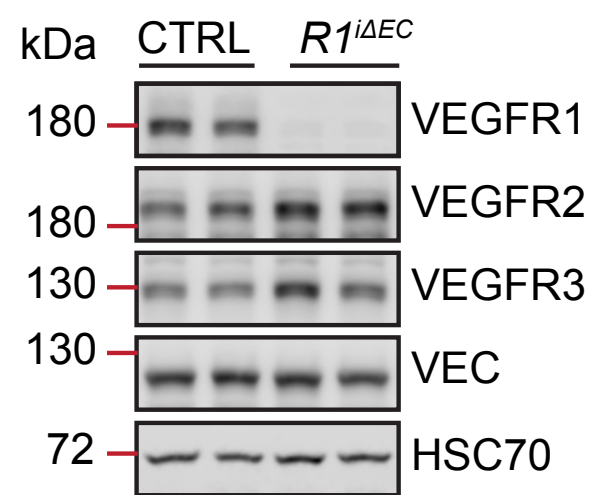

VEGFR1

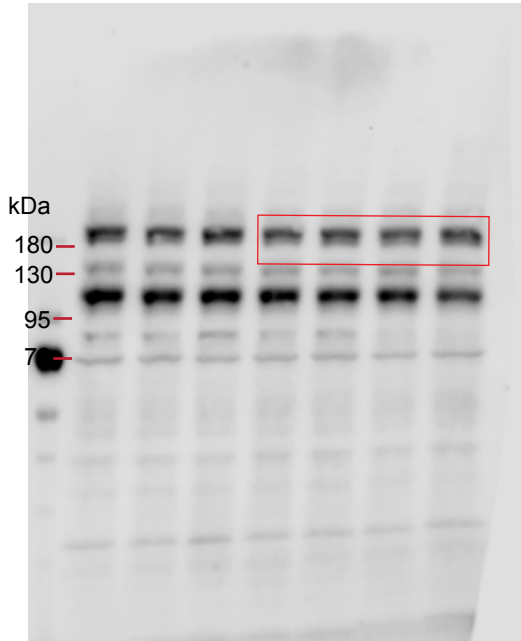

VEGFR2

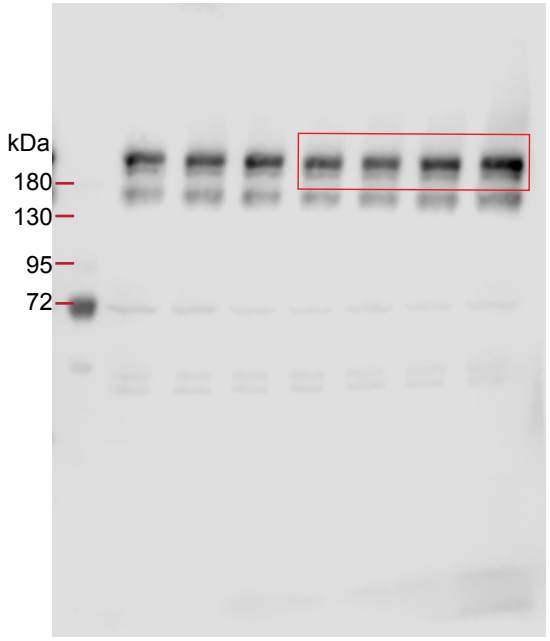

VEGFR3

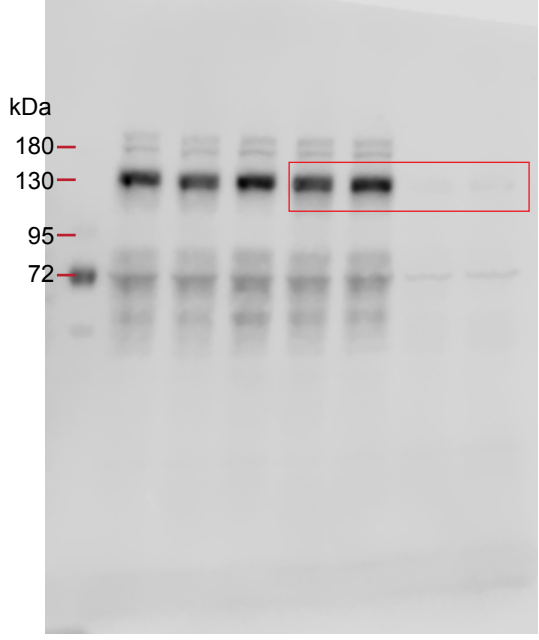

VEC

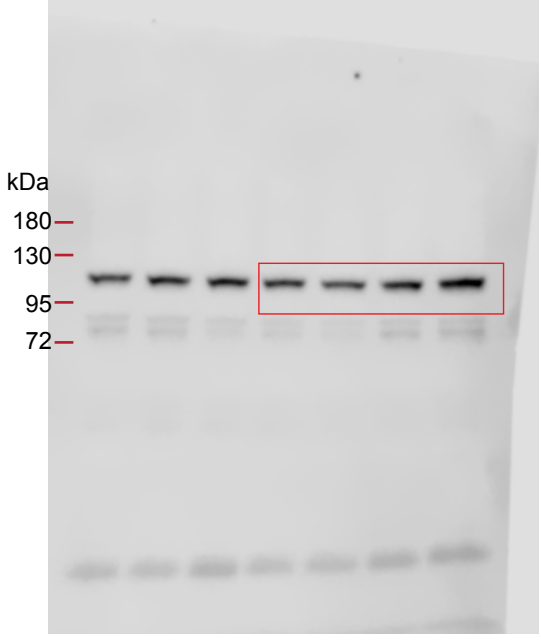

HSC70

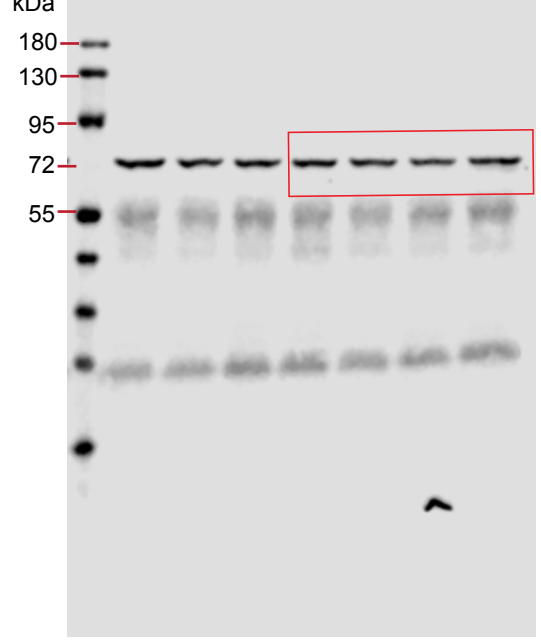

Figure version

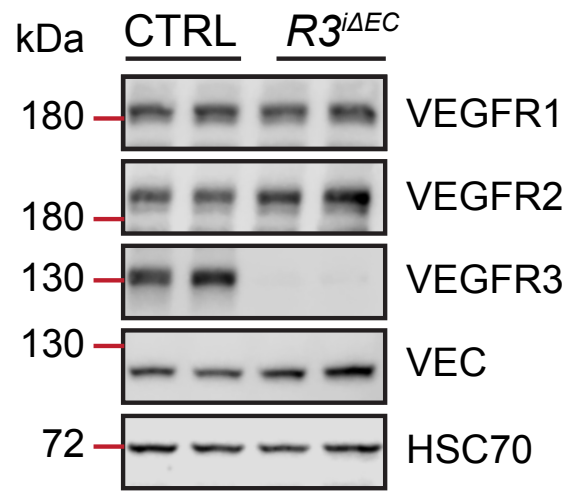

Supplement: JEM_20210565_SourceDataFS1.pdf [file JEM_20210565_SourceDataFS1.pdf]
